# Supplementary material
Source: Springer Nature journal article supplement (https://www.springermedizin.de/resource/supplementary/12891_2008_597_MOESM1_ESM.pdf/9506324)

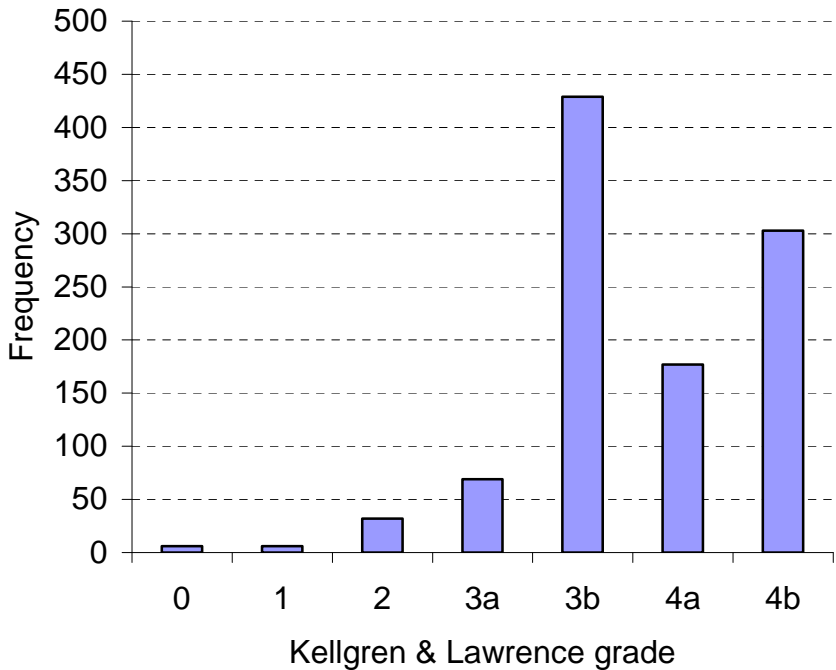

Supplement: MOESM1 [file 9506324]
